# Supplementary material for: Immunocompromised patients with acute respiratory distress syndrome: secondary analysis of the LUNG SAFE database
Source: PubMed Central journal article supplement (PMC5998562; doi:10.1186/s13054-018-2079-9), 2018-06-12
Supplement: 13054_2018_2079_MOESM3_ESM.pdf [file 13054_2018_2079_MOESM3_ESM.pdf]

**Table S2: Multivariable logistic regression model: factors associated with the use of non-invasive ventilation (n=2,784).**

| Effect                                   | OR    | 95% CI |       | P value |
|------------------------------------------|-------|--------|-------|---------|
| Age (year)                               | 1.017 | 1.010  | 1.024 | <.0001  |
| Non-pulmonary SOFA score <sup>a</sup>    | 0.789 | 0.762  | 0.817 | <.0001  |
| Immunocompromised (ref. No)              | 1.567 | 1.217  | 2.017 | 0.0005  |
| P/F ratio (mmHg)                         | 0.998 | 0.996  | 1.000 | 0.0193  |
| Aspiration of gastric contents (ref. No) | 0.376 | 0.250  | 0.566 | <.0001  |
| Non-pulmonary sepsis (ref. No)           | 0.630 | 0.444  | 0.893 | 0.0095  |
| Inhalation injury (ref. No)              | 0.211 | 0.064  | 0.692 | 0.0102  |
| Non-cardiogenic shock (ref. No)          | 0.555 | 0.311  | 0.989 | 0.0457  |
| Other ARDS risk factors (ref. No)        | 0.248 | 0.088  | 0.700 | 0.0085  |
| Home ventilation (ref. No)               | 1.977 | 1.101  | 3.551 | 0.0225  |
| Chronic renal failure (ref. No)          | 1.925 | 1.382  | 2.680 | 0.0001  |
| Chronic liver failure (ref. No)          | 2.021 | 1.005  | 4.066 | 0.0485  |

Abbreviation: ARDS: acute respiratory distress syndrome; CI: confidence interval; OR: odd ratio; SOFA: sequential organ failure assessment.

a. Non pulmonary SOFA score adjusted for missing values
