# Supplementary material for: Immunocompromised patients with acute respiratory distress syndrome: secondary analysis of the LUNG SAFE database
Source: Springer Nature journal article supplement (doi:10.1186/s13054-018-2079-9), 2018-06-12
Supplement: MOESM2 [file 15839512]

**Table S1: Patient characteristics of immunocompromised (Study) patients according to the type of ventilatory support**

|                                                             | IMV<br>(n=462) | NIV<br>(n=63) | NIV failure<br>(n=59) | p value           |
|-------------------------------------------------------------|----------------|---------------|-----------------------|-------------------|
| <b>Sex, age and BMI</b>                                     |                |               |                       |                   |
| Women, n (%)                                                | 198 (42.9)     | 27 (42.9)     | 22 (37.3)             | 0.7139            |
| Age (years), mean ± SD                                      | 59.7 ± 15.5    | 65.2 ± 16.5*  | 59.7 ± 14.3           | <b>0.0158</b>     |
| BMI (kg/m <sup>2</sup> ), mean ± SD                         | 25.7 ± 6.0     | 24.7 ± 5.4    | 24.3 ± 4.8            | 0.1140            |
| <b>Co-morbidities, n (%)</b>                                |                |               |                       |                   |
| COPD                                                        | 69 (14.9)      | 12 (19.0)     | 4 (6.8)               | 0.1392            |
| Diabetes mellitus                                           | 72 (15.6)      | 10 (15.9)     | 8 (13.6)              | 0.9157            |
| Heart failure (NYHA classes III-IV)                         | 24 (5.2)       | 3 (4.8)       | 3 (5.1)               | 1.0000            |
| Chronic renal failure                                       | 48 (10.4)      | 10 (15.9)     | 6 (10.2)              | 0.4168            |
| Chronic liver failure (Child-Pugh Class C)                  | 19 (4.1)       | 0 (0.0)       | 2 (3.4)               | 0.3044            |
| Home ventilation                                            | 5 (1.1)        | 1 (1.6)       | 1 (1.7)               | 0.4482            |
| <b>ARDS risk factors, n (%)</b>                             |                |               |                       |                   |
| Pneumonia                                                   | 311 (67.3)     | 51 (81.0)     | 50 (84.7)*            | <b>0.0035</b>     |
| Pulmonary contusion                                         | 1 (0.2)        | 0 (0.0)       | 0 (0.0)               | 1.0000            |
| Pulmonary vasculitis                                        | 3 (0.6)        | 3 (4.8)*      | 1 (1.7)               | <b>0.0255</b>     |
| Major trauma                                                | 1 (0.2)        | 0 (0.0)       | 0 (0.0)               | 1.0000            |
| Aspiration of gastric contents                              | 50 (10.8)      | 4 (6.3)       | 0 (0.0)*              | <b>0.0182</b>     |
| Pancreatitis                                                | 4 (0.9)        | 0 (0.0)       | 1 (1.7)               | 0.4794            |
| Non- cardiogenic shock                                      | 54 (11.7)      | 3 (4.8)       | 3 (5.1)               | 0.0906            |
| Drug-overdose                                               | 3 (0.6)        | 1 (1.6)       | 1 (1.7)               | 0.2808            |
| Severe burns                                                | 0 (0.0)        | 0 (0.0)       | 0 (0.0)               | -                 |
| Inhalational injury                                         | 12 (2.6)       | 0 (0.0)       | 0 (0.0)               | 0.3464            |
| Drowning                                                    | 1 (0.2)        | 0 (0.0)       | 0 (0.0)               | 1.0000            |
| Non-pulmonary sepsis                                        | 83 (18.0)      | 6 (9.5)       | 5 (8.5)               | 0.0565            |
| Blood transfusions                                          | 27 (5.8)       | 1 (1.6)       | 1 (1.7)               | 0.2436            |
| Other risk factors                                          | 12 (2.6)       | 0 (0.0)       | 1 (1.7)               | 0.5942            |
| None                                                        | 33 (7.1)       | 4 (6.3)       | 3 (5.1)               | 0.9550            |
| <b>Cause of immunosuppression, n (%)</b>                    |                |               |                       |                   |
| Known (hematologic and/or active neoplasm)                  | 283 (61.3)     | 37 (58.7)     | 37 (62.7)             | 0.8968            |
| Unknown                                                     | 179 (38.7)     | 26 (41.3)     | 22 (37.3)             |                   |
| <b>Illness severity at ARDS onset</b>                       |                |               |                       |                   |
| Non-pulmonary SOFA score <sup>a</sup> , mean ± SD           | 7.0 ± 3.9      | 3.7 ± 3.1*    | 5.3 ± 3.6*            | <b>&lt;0.0001</b> |
| PaO <sub>2</sub> /FiO <sub>2</sub> ratio (mm Hg), mean ± SD | 159.4 ± 70.0   | 154.5 ± 58.4  | 142.5 ± 59.2          | 0.2359            |
| Mild ARDS <sup>b</sup> , n (%)                              | 143 (31.0)     | 15 (23.8)     | 9 (15.3)*             | <b>0.0286</b>     |
| Moderate ARDS <sup>b</sup> , n (%)                          | 201 (43.5)     | 37 (58.7)*    | 33 (55.9)             | <b>0.0228</b>     |
| Severe ARDS <sup>b</sup> , n (%)                            | 118 (25.5)     | 11 (17.5)     | 17 (28.8)             | 0.2953            |

Abbreviations: ARDS: acute respiratory distress syndrome; COPD: chronic obstructive pulmonary disease; IMV: patients invasively ventilated from Day 1, independently of the type of support received after the eventual extubation; NIV: patients treated exclusively with non-invasive ventilation, from Day 1 to study exit, independently of outcome; NIV failure: patients initially treated with non-invasive ventilation and subsequently intubated during the study period; NYHA: New York Heart Association; SD: standard deviation; SOFA: sequential organ failure assessment.

a. Non pulmonary SOFA score adjusted for missing values

b. Severity of ARDS was evaluated according to the Berlin definition

Note: Bold p values shows a statistically significant difference among the three groups

\* Statistically significant different from IMV group; † Statistically significant different from NIV group
