# Supplementary material for: Immunocompromised patients with acute respiratory distress syndrome: secondary analysis of the LUNG SAFE database
Source: Springer Nature journal article supplement (doi:10.1186/s13054-018-2079-9), 2018-06-12
Supplement: MOESM4 [file 15839512]

**Table S3: Ventilator settings during the first day of acute respiratory distress syndrome, in immunocompetent (Control) and immunocompromised (Study) patients**

|                                                                                    | <b>Control<br/>(n=2229)</b> | <b>Study<br/>(n=584)</b> | <b>p value</b>    |
|------------------------------------------------------------------------------------|-----------------------------|--------------------------|-------------------|
| FiO <sub>2</sub> , mean ± SD                                                       | 0.6 ± 0.2                   | 0.7 ± 0.2                | <b>0.0019</b>     |
| Set respiratory rate (bpm), mean ± SD                                              | 18.0 ± 9.1                  | 19.0 ± 7.3               | <b>0.0007</b>     |
| Total respiratory rate (bpm), mean ± SD                                            | 21.3 ± 8.9                  | 22.9 ± 7.3               | <b>&lt;0.0001</b> |
| Tidal volume (mL/kg IBW), mean ± SD                                                | 7.7 ± 2.0                   | 7.6 ± 2.0                | 0.1374            |
| PEEP (cmH <sub>2</sub> O), mean ± SD                                               | 8.2 ± 3.2                   | 8.4 ± 3.2                | <b>0.0246</b>     |
| PIP (cmH <sub>2</sub> O), mean ± SD                                                | 25.6 ± 8.5                  | 26.0 ± 9.4               | 0.2854            |
| Plateau pressure (cmH <sub>2</sub> O) <sup>a</sup> , mean ± SD                     | 23.0 ± 6.1                  | 23.8 ± 6.2               | 0.1259            |
| Patients with spontaneous ventilation (triggering ventilator) <sup>b</sup> , n (%) | 1258 (57.4)                 | 342 (59.4)               | 0.3971            |

Abbreviations: IBW: ideal body weight; PEEP: positive end-expiratory pressure; PIP: peak inspiratory pressure; SD: standard deviation.

a. Plateau pressure were available for 742 patients (571 immunocompetent and 171 immunocompromised patients)

b. Information was available for 2767 patients (2191 immunocompetent and 576 immunocompromised patients)

Note: Bold p values shows a statistically significant difference between the two groups
