# Supplementary material for: Immunocompromised patients with acute respiratory distress syndrome: secondary analysis of the LUNG SAFE database
Source: Springer Nature journal article supplement (doi:10.1186/s13054-018-2079-9), 2018-06-12
Supplement: MOESM5 [file 15839512]

**Table S4: Proportion of use of adjunctive measures/therapies during at least one day during follow-up, in immunocompetent (Control) and immunocompromised (Study) groups**

|                                                 | <b>Control<br/>(n=2229)</b> | <b>Study<br/>(n=584)</b> | <b>p value</b> |
|-------------------------------------------------|-----------------------------|--------------------------|----------------|
| <b><i>Adjunctive measure/therapy, n (%)</i></b> |                             |                          |                |
| Prone positioning                               | 152 (6.8)                   | 47 (8.0)                 | 0.3026         |
| Recruitment maneuvers                           | 414 (18.6)                  | 121 (20.7)               | 0.2395         |
| ECMO                                            | 63 (2.8)                    | 15 (2.6)                 | 0.7355         |
| Renal replacement therapy                       | 428 (19.2)                  | 122 (20.9)               | 0.3596         |
| Continuous sedation                             | 1666 (74.7)                 | 455 (77.9)               | 0.1135         |
| Continuous NMBs                                 | 413 (18.5)                  | 132 (22.6)               | <b>0.0266</b>  |
| Esophageal pressure monitoring                  | 16 (0.7)                    | 3 (0.5)                  | 0.7797         |
| Tracheostomy                                    | 250 (11.2)                  | 76 (13.0)                | 0.2269         |

Abbreviations: ECMO: extra corporeal membrane oxygenation; NMB: neuromuscular blocking agent.

Note: Bold p values shows a statistically significant difference between the two groups
