# Supplementary material for: Immunocompromised patients with acute respiratory distress syndrome: secondary analysis of the LUNG SAFE database
Source: Springer Nature journal article supplement (doi:10.1186/s13054-018-2079-9), 2018-06-12
Supplement: MOESM7 [file 15839512]

**Figure S1: Kaplan Meier curve for hospital survival of immunocompromised patients according to ARDS severity**

Mortality is defined as mortality at hospital discharge or at 90 days after onset of acute hypoxemic respiratory failure, whichever event occurred first. We assumed that patients discharged alive from hospital before 90 days were alive on day 90. Severity of acute respiratory distress syndrome (ARDS) was evaluated at day of onset, according to the Berlin definition.

Note: the number of patients reported in the bottom of figure is referred to the end of corresponding day.

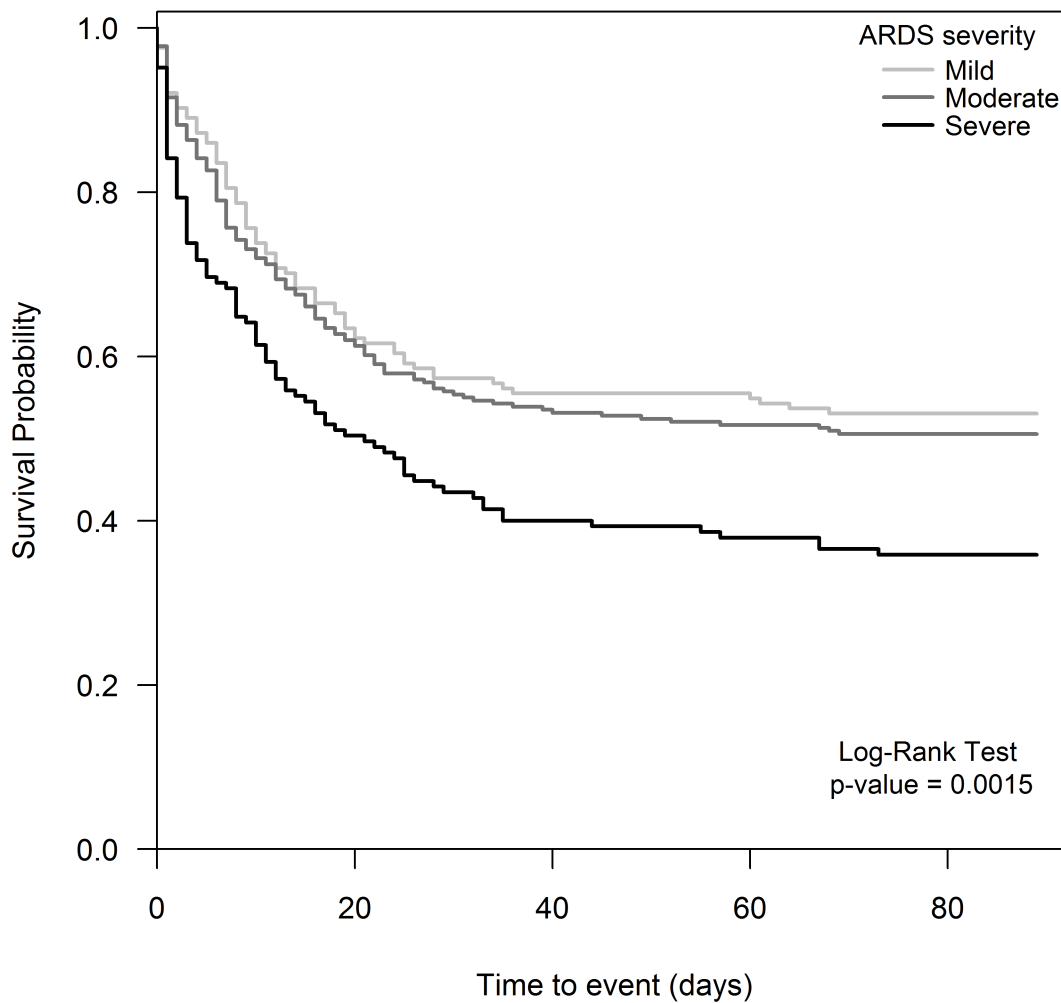

| # at risk | 0   | 20  | 40  | 60  | 80  |
|-----------|-----|-----|-----|-----|-----|
| Mild      | 164 | 104 | 91  | 91  | 87  |
| Moderate  | 271 | 168 | 145 | 140 | 137 |
| Severe    | 145 | 73  | 58  | 55  | 52  |
