# Supplementary material for: Immunocompromised patients with acute respiratory distress syndrome: secondary analysis of the LUNG SAFE database
Source: Springer Nature journal article supplement (doi:10.1186/s13054-018-2079-9), 2018-06-12

**Figure S2. Kaplan Meier curve for hospital survival of immunocompromised patients according to the ventilation subgroup**

Mortality is defined as mortality at hospital discharge or at 90 days after onset of acute hypoxemic respiratory failure, whichever event occurred first. We assumed that patients discharged alive from hospital before 90 days were alive on day 90.

Type of ventilator support: IMV: patients invasively ventilated from Day 1, independently of the type of support received after the eventual extubation; NIV: patients treated exclusively with non-invasive ventilation, from Day 1 to study exit, independently of outcome; NIV failure: patients initially treated with non-invasive ventilation and subsequently intubated during the study period.

Note: the number of patients reported in the bottom of figure is referred to the end of corresponding day.

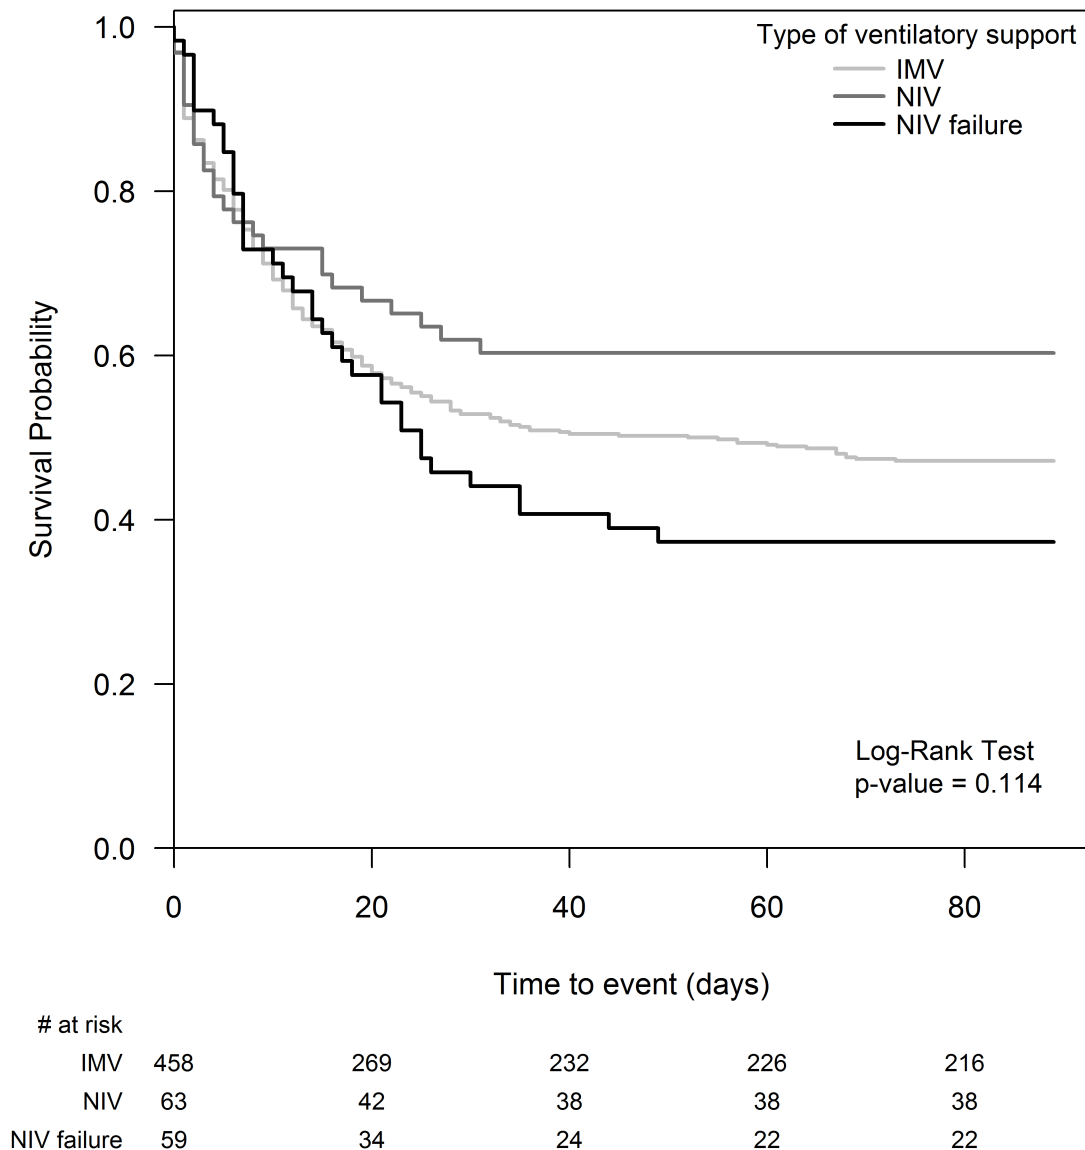

Supplement: MOESM8 [file 15839512]
