# Supplementary material for: Immunocompromised patients with acute respiratory distress syndrome: secondary analysis of the LUNG SAFE database
Source: Springer Nature journal article supplement (doi:10.1186/s13054-018-2079-9), 2018-06-12
Supplement: MOESM9 [file 15839512]

**Table S5: Multivariable logistic regression model: factors associated with hospital mortality in immunocompromised (Study) patients (n=463).**

| Effect                                | OR    | 95% CI |       | P value |
|---------------------------------------|-------|--------|-------|---------|
| Non-pulmonary SOFA score <sup>a</sup> | 1.079 | 1.026  | 1.134 | 0.0032  |
| P/F ratio (mmHg)                      | 0.995 | 0.992  | 0.998 | 0.0022  |
| $\Delta$ P/F ratio (%) <sup>b</sup>   | 0.996 | 0.993  | 0.999 | 0.0058  |
| BMI (kg/m <sup>2</sup> )              | 0.944 | 0.910  | 0.980 | 0.0023  |
| PIP (cm H <sub>2</sub> O)             | 1.028 | 1.007  | 1.051 | 0.0097  |

Abbreviations: BMI: body mass index; CI: confidence interval; OR: odds ratio; PIP: peak inspiratory pressure; SOFA: sequential organ failure assessment

a. Non pulmonary SOFA score adjusted for missing values

b. Delta ( $\Delta$ ) was evaluated as difference between the value measured at the second day and those measured at the ARDS onset day.  $\Delta$  (%) was evaluated as rate between  $\Delta$  and value measured at the ARDS onset day

Note: Mortality is defined as mortality at hospital discharge or at ninetieth day in hospital, after onset of acute hypoxemic respiratory failure, which ever event occurred first.
