# Supplementary material for: Immunocompromised patients with acute respiratory distress syndrome: secondary analysis of the LUNG SAFE database
Source: Springer Nature journal article supplement (doi:10.1186/s13054-018-2079-9), 2018-06-12
Supplement: MOESM10 [file 15839512]

**Table S9: Most important factors leading to death in ICU, in immunocompetent (Control) and immunocompromised (Study) patients**

|                               | <b>Control<br/>(n=698)</b> | <b>Study<br/>(n=266)</b> | <b>p value</b> |
|-------------------------------|----------------------------|--------------------------|----------------|
| Respiratory failure, n (%)    | 264 (37.8)                 | 137 (51.5)               | <b>0.0001</b>  |
| Cardiovascular failure, n (%) | 271 (38.8)                 | 87 (32.7)                | 0.0788         |
| Neurologic failure, n (%)     | 85 (12.2)                  | 20 (7.5)                 | <b>0.0380</b>  |
| Hepatic failure, n (%)        | 42 (6.0)                   | 9 (3.4)                  | 0.1025         |
| Renal failure, n (%)          | 21 (3.0)                   | 7 (2.6)                  | 0.7554         |
| Coagulation failure, n (%)    | 10 (1.4)                   | 2 (0.8)                  | 0.5277         |
| Unknown, n (%)                | 5 (0.7)                    | 4 (1.5)                  | 0.2704         |
